# Supplementary material for: Social Interventions to Prevent Heat-Related Mortality in the Older Adult in Rome, Italy: A Quasi-Experimental Study
Source: MDPI journal article supplement (doi:10.3390/ijerph15040715), 2018-04-11
Supplement: s1 [file s1]

Table S1. Variables tested against the mortality indicators (Univariate Linear Regression)

| Urban areas                             |         | Cumulative death rate summer 2015 | Increase of death (%) Jun-Sep 2014 – Jun-Sep 2015 | Cumulative death rate 2015 | Cumulative death rate jun 2014 – Dec 2016 |
|-----------------------------------------|---------|-----------------------------------|---------------------------------------------------|----------------------------|-------------------------------------------|
| Mean age Summer 2015                    | $\beta$ | <b>0.777*</b>                     | 0.712                                             | 0.697                      | 0.677                                     |
|                                         | p       | <b>0.040</b>                      | 0.073                                             | 0.082                      | 0.095                                     |
| Over-90 residents: share in summer 2015 | $\beta$ | <b>0.767</b>                      | <b>0.810</b>                                      | <b>0.804</b>               | 0.503                                     |
|                                         | p       | <b>0.044</b>                      | <b>0.027</b>                                      | <b>0.029</b>               | 0.250                                     |
| Percentage of females                   | $\beta$ | <b>0.385</b>                      | <b>0.282</b>                                      | <b>0.420</b>               | <b>0.742</b>                              |
|                                         | p       | <b>0.394</b>                      | <b>0.541</b>                                      | <b>0.348</b>               | <b>0.056</b>                              |
| Property tax valuation                  | $\beta$ | -0.196                            | -0.020                                            | -0.404                     | <b>-0.829</b>                             |
|                                         | p       | 0.673                             | 0.965                                             | 0.369                      | <b>0.021</b>                              |
| Social discomfort index*                | $\beta$ | -0.519                            | -0.530                                            | -0.388                     | 0.080                                     |
|                                         | p       | 0.233                             | 0.221                                             | 0.389                      | 0.864                                     |
| Housing discomfort index**              | $\beta$ | -0.557                            | -0.381                                            | -0.144                     | -0.497                                    |
|                                         | p       | 0.194                             | 0.399                                             | 0.759                      | 0.256                                     |

\* Combination of the following data calculated for the interested Urban Area: Unemployment rate, Employment rate, share of Youth (population aged less than 25) over the total population and Schooling rate

\*\* Combination of the following data calculated for the interested Urban Area: share of residential buildings of the urban area of interest in a bad or mediocre state of conservation) over the Total residential buildings of the same urban area, adjusted for the weighting coefficient (0.168) which is the national percentage of residential buildings with "bad" or "mediocre" conservation status.
