# Supplementary material for: Social Interventions to Prevent Heat-Related Mortality in the Older Adult in Rome, Italy: A Quasi-Experimental Study
Source: Int J Environ Res Public Health. 2018 Apr 11;15(4):715. doi: 10.3390/ijerph15040715 (PMC5923757; doi:10.3390/ijerph15040715)
Supplement: Supplementary file 1 [file ijerph-15-00715-s001.zip › file_data.xlsx]

## Sheet: Foglio1
Urban Area	LLE program	May_2014_Deaths_	May_2014- Pop	May_2014_rate‰	Jun_2014_Deaths_	Jun_2014- Pop	Jun_2014_rate‰	Jul_2014_Deaths_	Jul_2014- Pop	Jul_2014_rate‰	Aug_2014_Deaths_	Aug_2014- Pop	Aug_2014_rate‰	Sep_2014_Deaths_	Sep_2014- Pop	Sep_2014_rate‰	Oct_2014_Deaths_	Oct_2014- Pop	Oct_2014_rate‰	Nov_2014_Deaths_	Nov_2014- Pop	Nov_2014_rate‰	Dec_2014_Deaths_	Dec_2014- Pop	Dec_2014_rate‰	Jan_ 2015_ Deaths	Jan_2015_Pop	Jan_2015_Rate	Feb_ 2015_ Deaths	Feb_2015_Pop	Feb_2015- Rate	Mar_ 2015_ Deaths	Mar_2015_Pop	Mar_2015- Rate	Apr_ 2015_ Deaths	Apr_2015_Pop	Apr_2015- Rate	May_2015_Deaths_	May_2015- Pop	May_2015_rate‰	Jun_2015_Deaths_	Jun_2015- Pop	Jun_2015_rate‰	Jul_2015_Deaths_	Jul_2015- Pop	Jul_2015_rate‰	Aug_2015_Deaths_	Aug_2015- Pop	Aug_2015_rate‰
Centro storico	NO	21	2621.86	8.00959	10	2675	3.73832	16	2908	5.50206	10	2690	3.71747	10	2694	3.71195	13	2704	4.80769	15	2700	5.55556	19	2799	6.78814	17	2807	6.05629	9	2813	3.19943	20	2810	7.11744	23	2801	8.21135	12	2820	4.25532	9	2831	3.17909	18	2834	6.35145	22	2842	7.74103
trastevere	YES	8	1360.71	5.87927	4	1386	2.886	8	1493	5.35834	4	1398	2.86123	5	1407	3.55366	3	1421	2.11119	12	1416	8.47458	10	1445	6.92042	13	1436	9.05292	9	1444	6.23269	8	1446	5.5325	10	1453	6.88231	6	1455	4.12371	3	1465	2.04778	10	1471	6.7981	12	1471	8.15772
Aventino	NO	9	971.571	9.26334	4	1020	3.92157	4	1162	3.44234	2	1024	1.95312	2	1026	1.94932	3	1029	2.91545	3	1034	2.90135	9	1133	7.94351	10	1136	8.80282	5	1141	4.38212	5	1143	4.37445	5	1141	4.38212	9	1144	7.86713	6	1141	5.25855	14	1140	12.2807	10	1132	8.83392
testaccio	YES	5	910.429	5.49192	8	970	8.24742	5	1151	4.34405	3	979	3.06435	4	980	4.08163	7	979	7.15015	8	981	8.15494	4	1109	3.60685	9	1100	8.18182	10	1104	9.05797	3	1113	2.69542	5	1116	4.48029	4	1119	3.57462	7	1124	6.22776	5	1124	4.4484	15	1123	13.3571
Esquilino	YES	21	3749.71	5.60043	20	3793	5.27287	21	4048	5.18775	10	3819	2.61849	17	3821	4.4491	20	3822	5.23286	22	3833	5.73963	29	3894	7.44735	30	3901	7.69034	34	3891	8.73811	31	3892	7.96506	21	3891	5.39707	20	3906	5.12033	23	3899	5.89895	23	3889	5.91412	36	3884	9.2688
XX settembre	NO	6	1196.71	5.01373	7	1213	5.77082	4	1298	3.08166	2	1219	1.64069	5	1223	4.08831	5	1223	4.08831	8	1222	6.54664	4	1251	3.19744	4	1253	3.19234	9	1250	7.2	9	1255	7.17131	5	1263	3.95883	3	1263	2.3753	7	1263	5.54236	12	1257	9.54654	17	1250	13.6
Celio	NO	2	487.857	4.09956	2	490	4.08163	2	517	3.86847		496	0	3	496	6.04839	4	497	8.04829	3	496	6.04839	7	495	14.1414	4	496	8.06452	3	495	6.06061	8	492	16.2602	2	495	4.0404	2	495	4.0404	3	494	6.07287	2	496	4.03226	8	497	16.0966
1A. Angelini. Il riclassamento delle unità immobiliari di Roma Capitale Roma, 16 aprile 2014. http://www.architettiroma.it/fpdb/file/2014/04/riclassamento01-ArturoAngelini.pdf accessed 20.12.2017
2 GLI INDICI DI DISAGIO SOCIALE ED EDILIZIO RICALCOLATI SU BASE ROMA - Analisi per municipio e zona urbanistica, Dati di censimento 2011. http://www.comune.roma.it/resources/cms/documents/Gli_indici_di_disagio_sociale_ed_edilizio_ricalcolati_su_base_Roma_X.pdf accessed 20.12.2017
3 based on the average of population from June to September 2015
[truncated: 54 more columns]
